# Supplementary material for: A Gene Co-Expression Network-Based Drug Repositioning Approach Identifies Candidates for Treatment of Hepatocellular Carcinoma
Source: MDPI journal article supplement (doi:10.3390/cancers14061573), 2022-03-19
Supplement: s1 [file s1]

# Supplementary Figure 1.

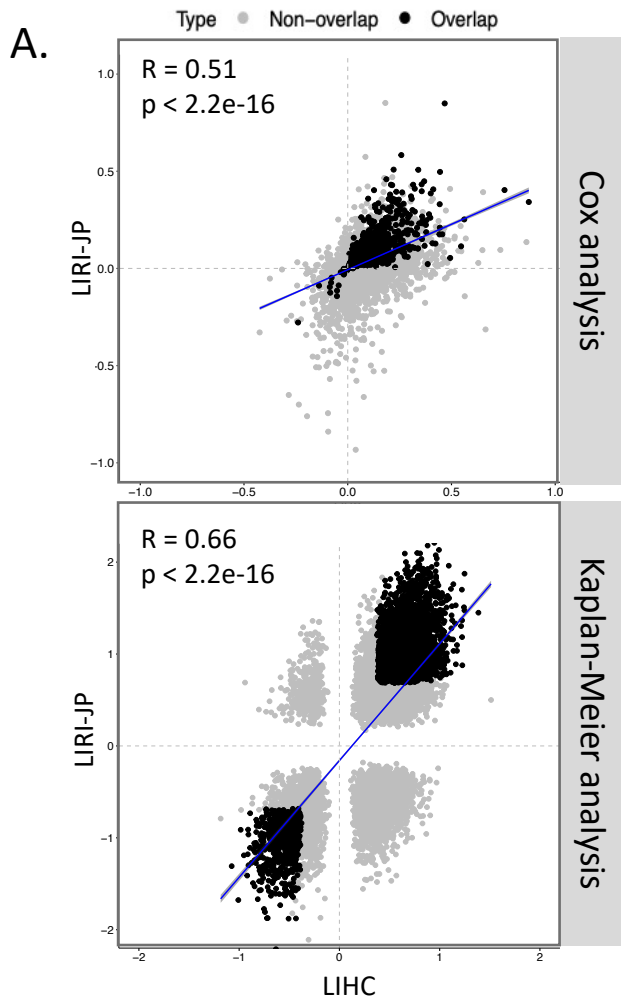

Correlation for Survival analysis

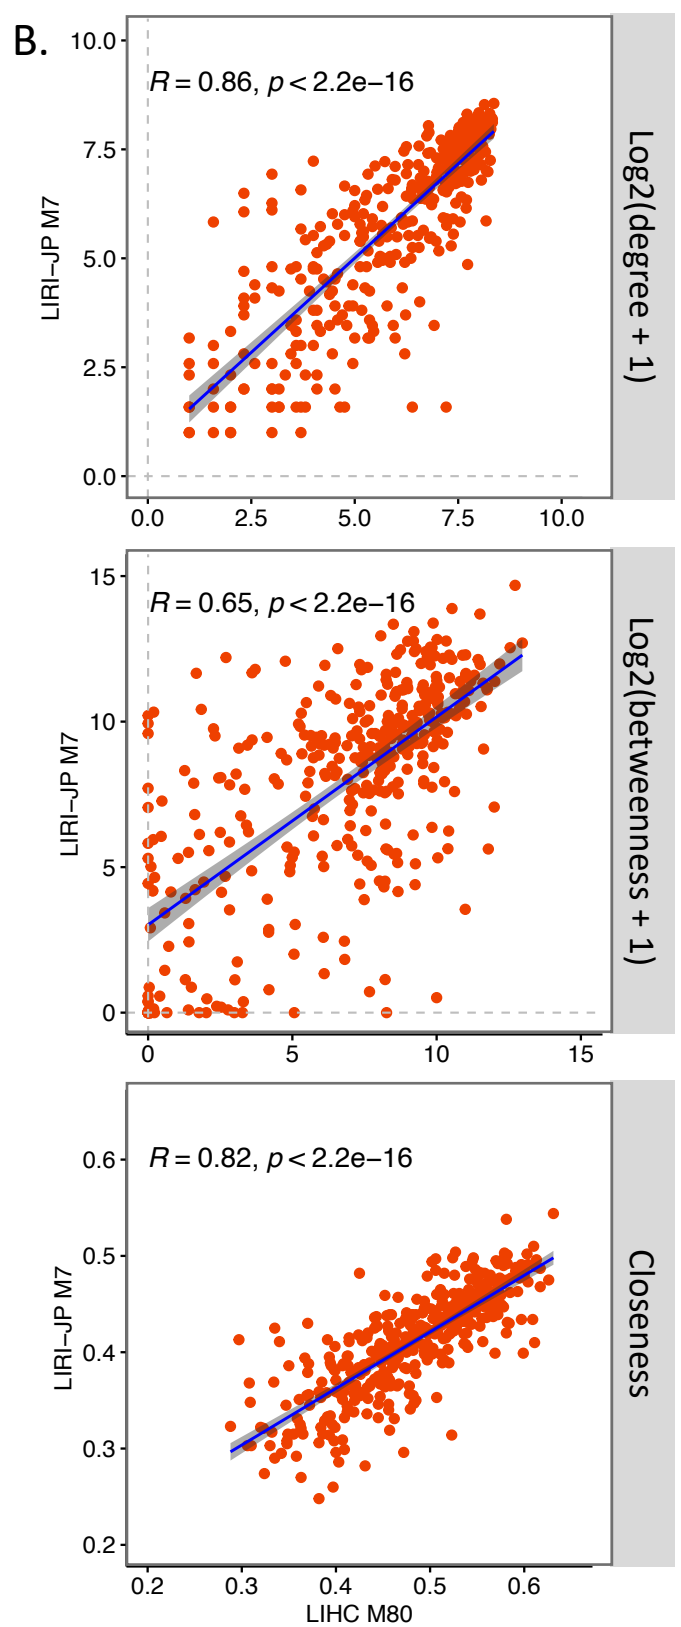

Topology correlation in two cohorts

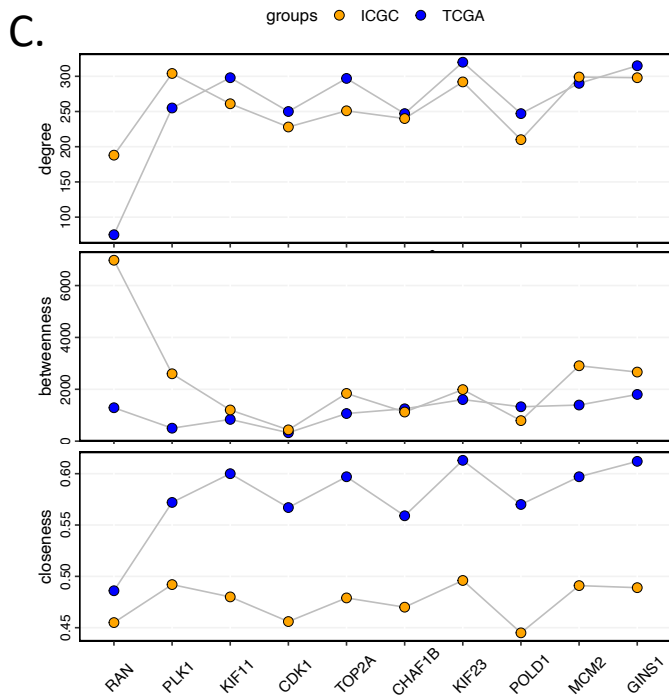

# Supplementary Figure 2. Kaplan Meier plots of target gene

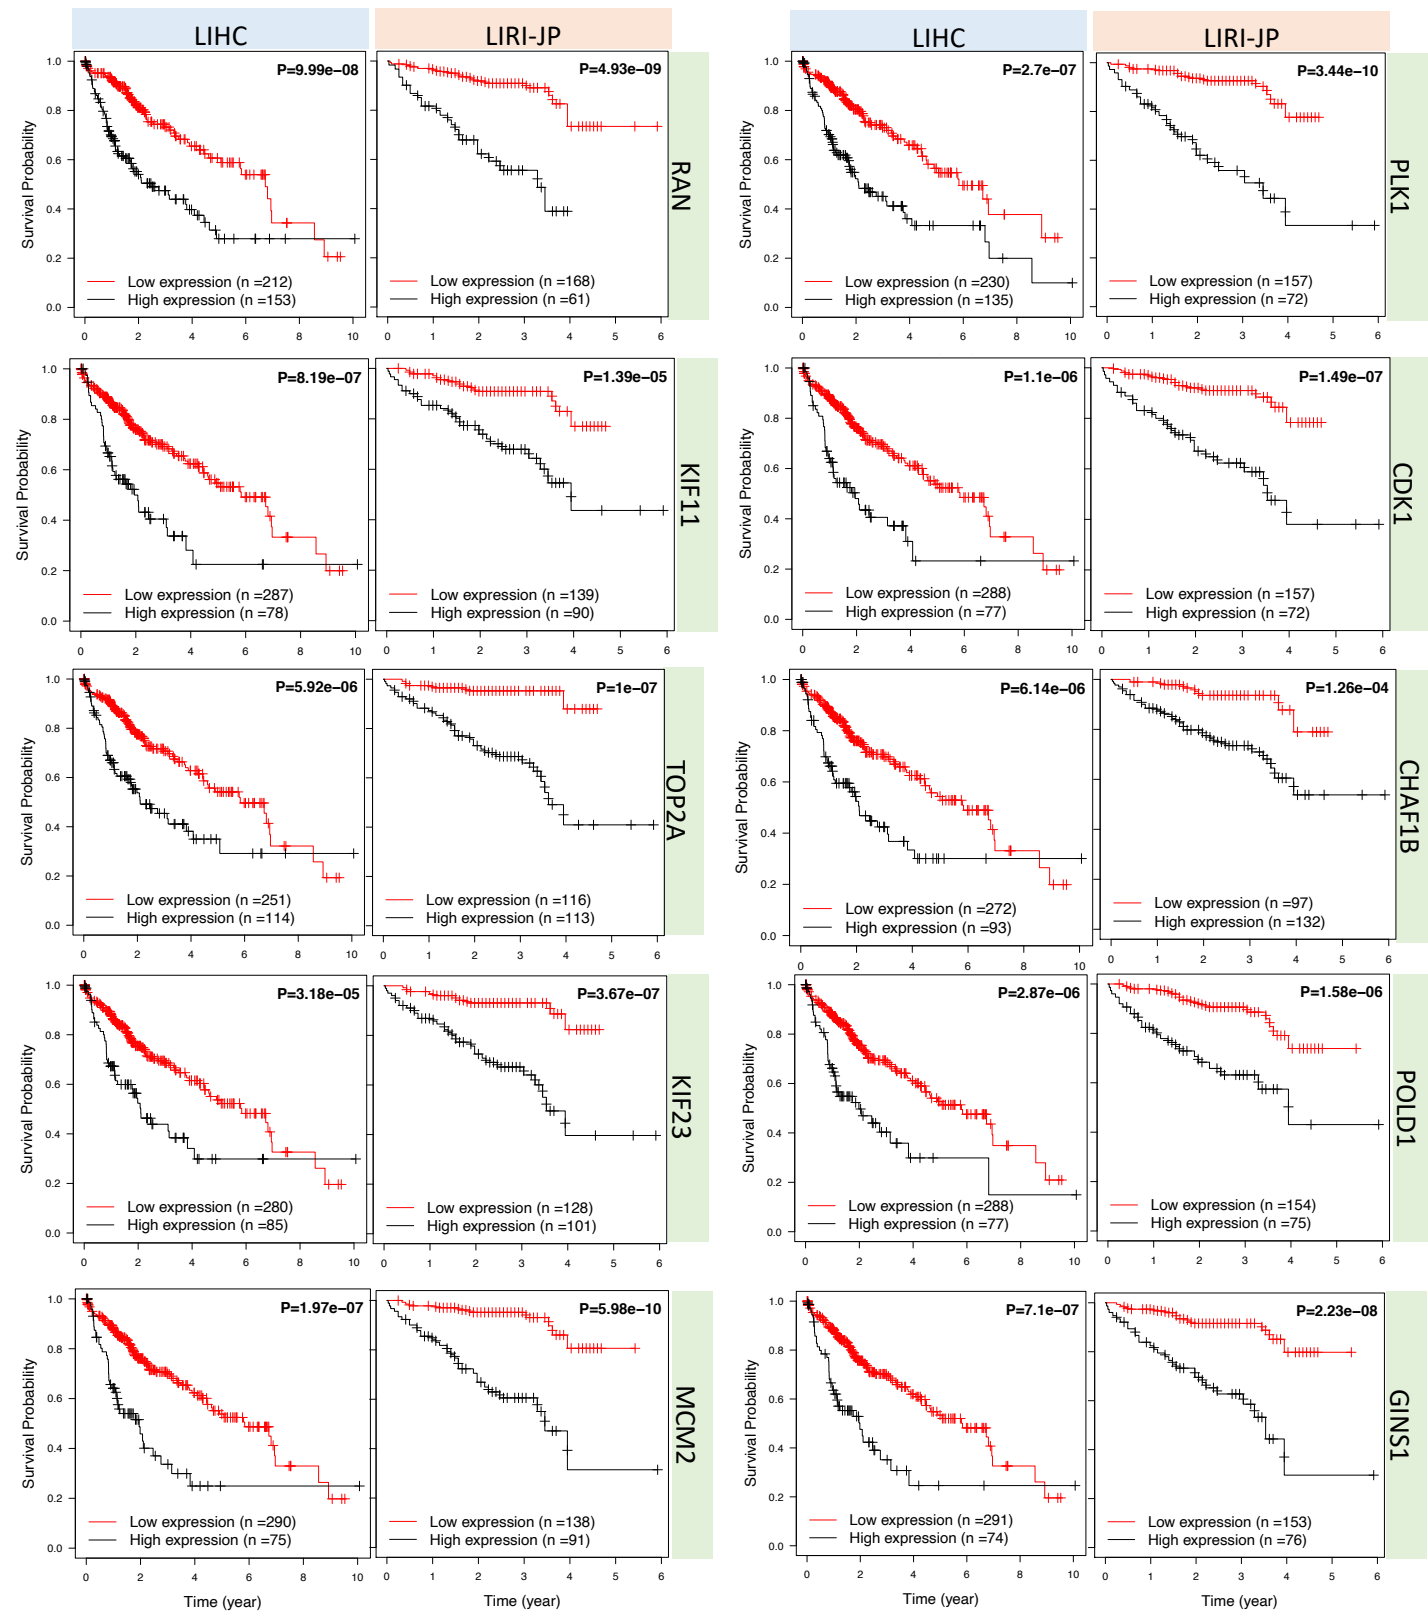

# Supplementary Figure 3.

## Top drug identification of *KIF11*, *CDK1*, *RAN*, *CHAF1B*.

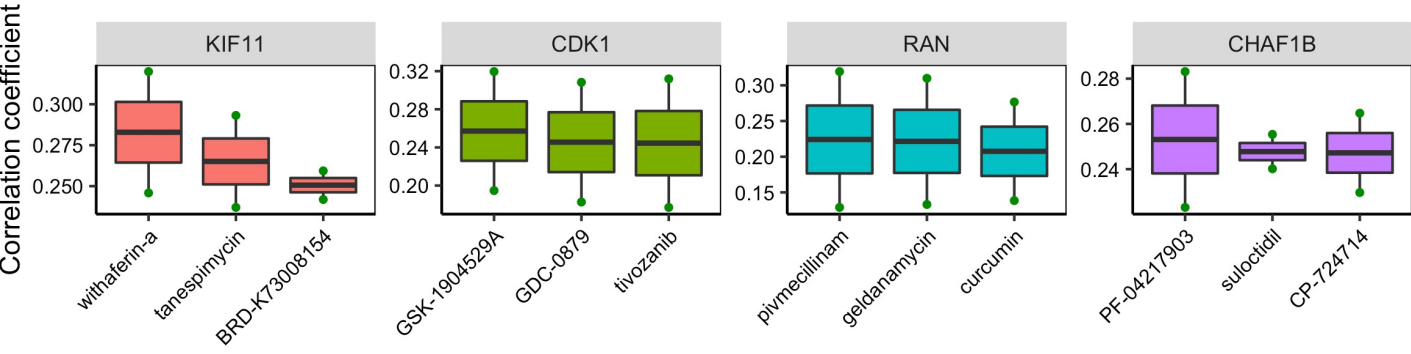

# Supplementary Figure 4.

The expression pattern of potential target genes in different cell types

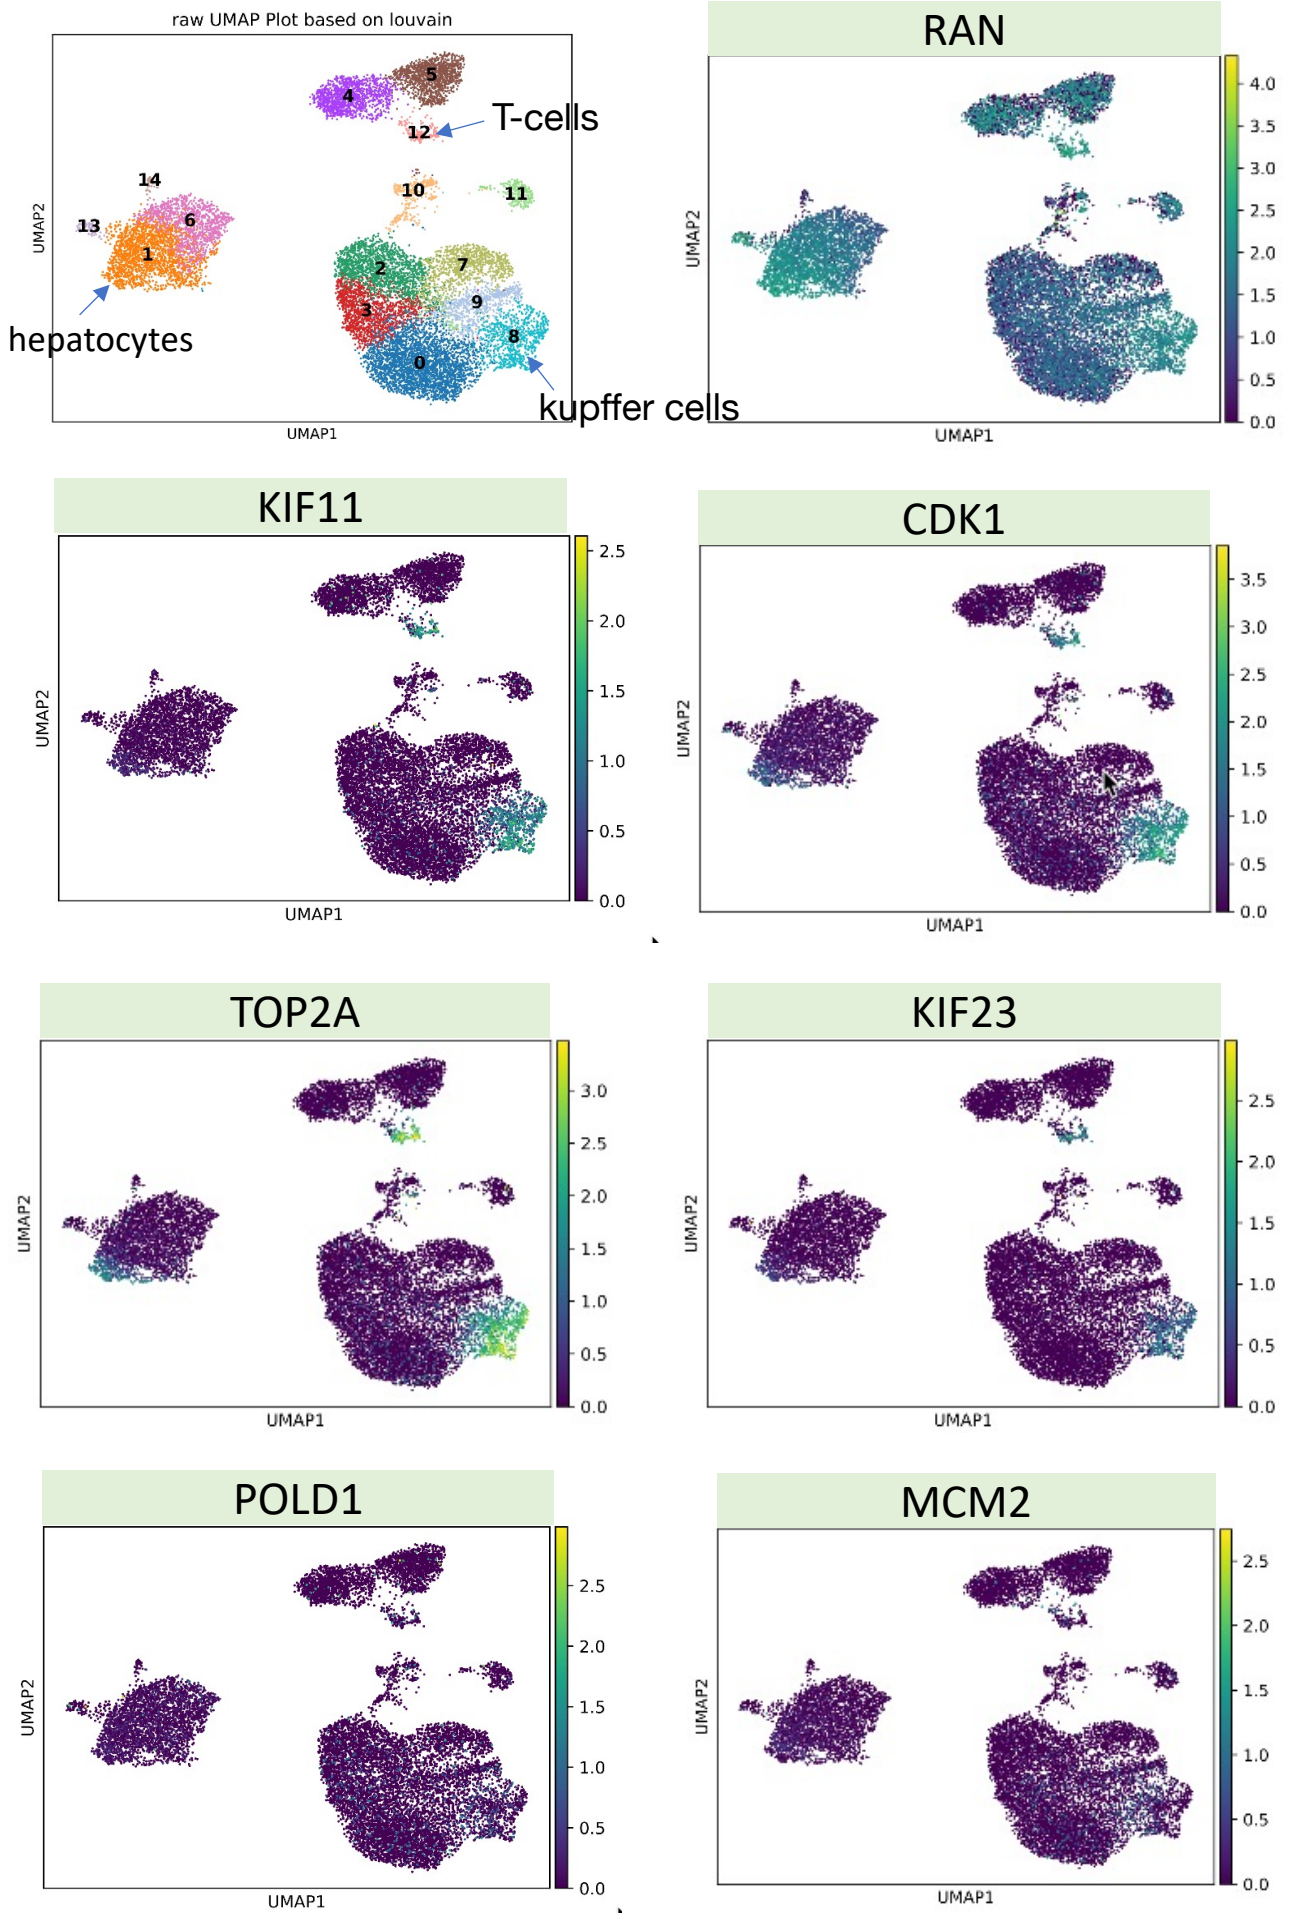

# Supplementary Figure 5.

## Clustering analysis of shRNAs for target genes

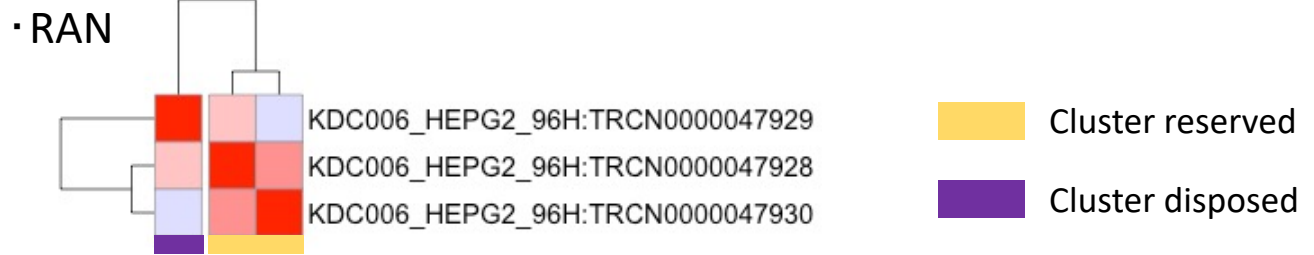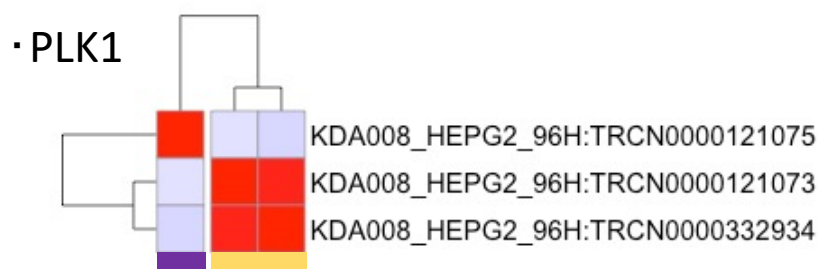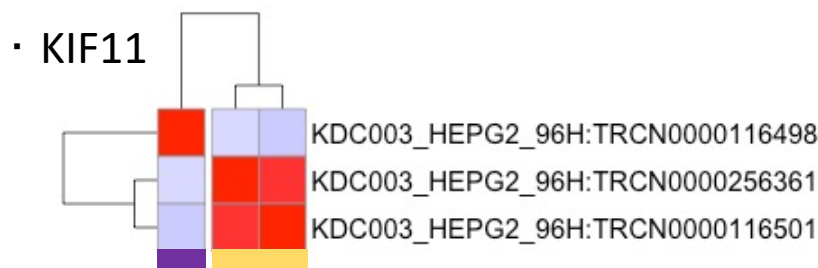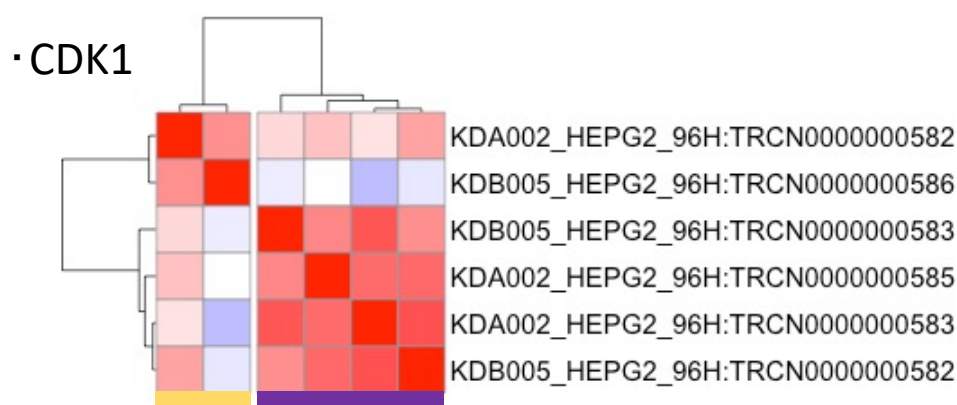

• TOP2A

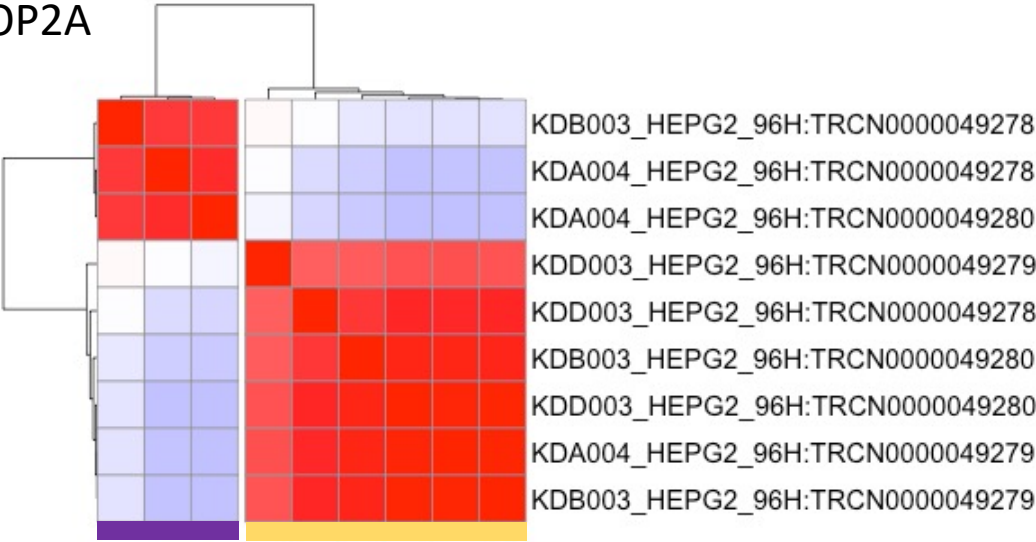

• CHAF1B

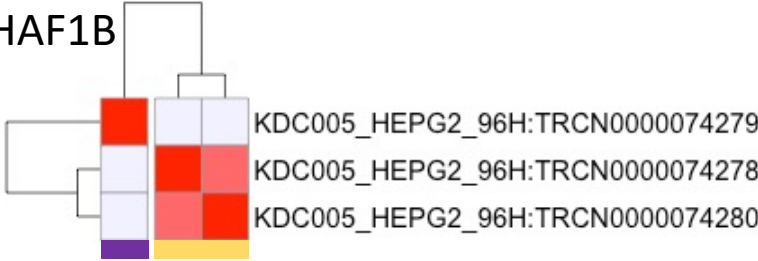

• MCM2

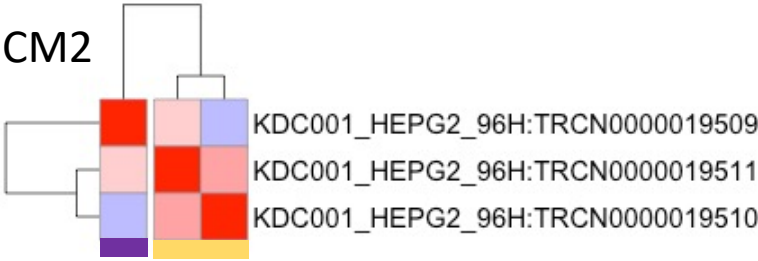

# Supplementary Figure 6.

## Protein expression levels in in-vitro model

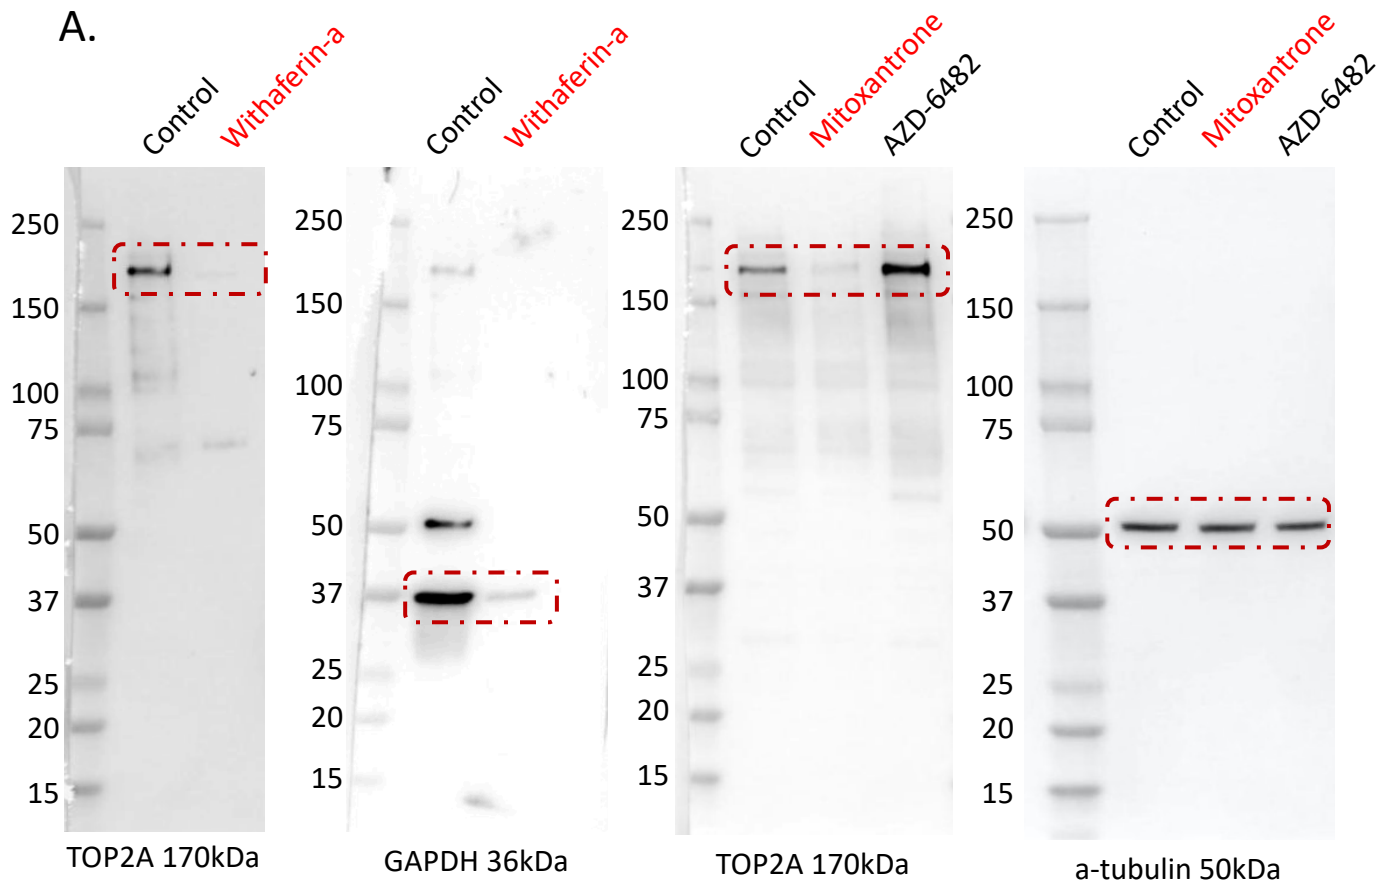

| TOP2A (GAPDH) | Intensity ratio |
|---------------|-----------------|
| Control       | 1               |
| Withaferin-a  | 0.32            |

| TOP2A (A-tubulin) | Intensity ratio |
|-------------------|-----------------|
| Control           | 1               |
| Mitoxantrone      | 0.43            |
| AZD-6482          | 2.57            |

B.

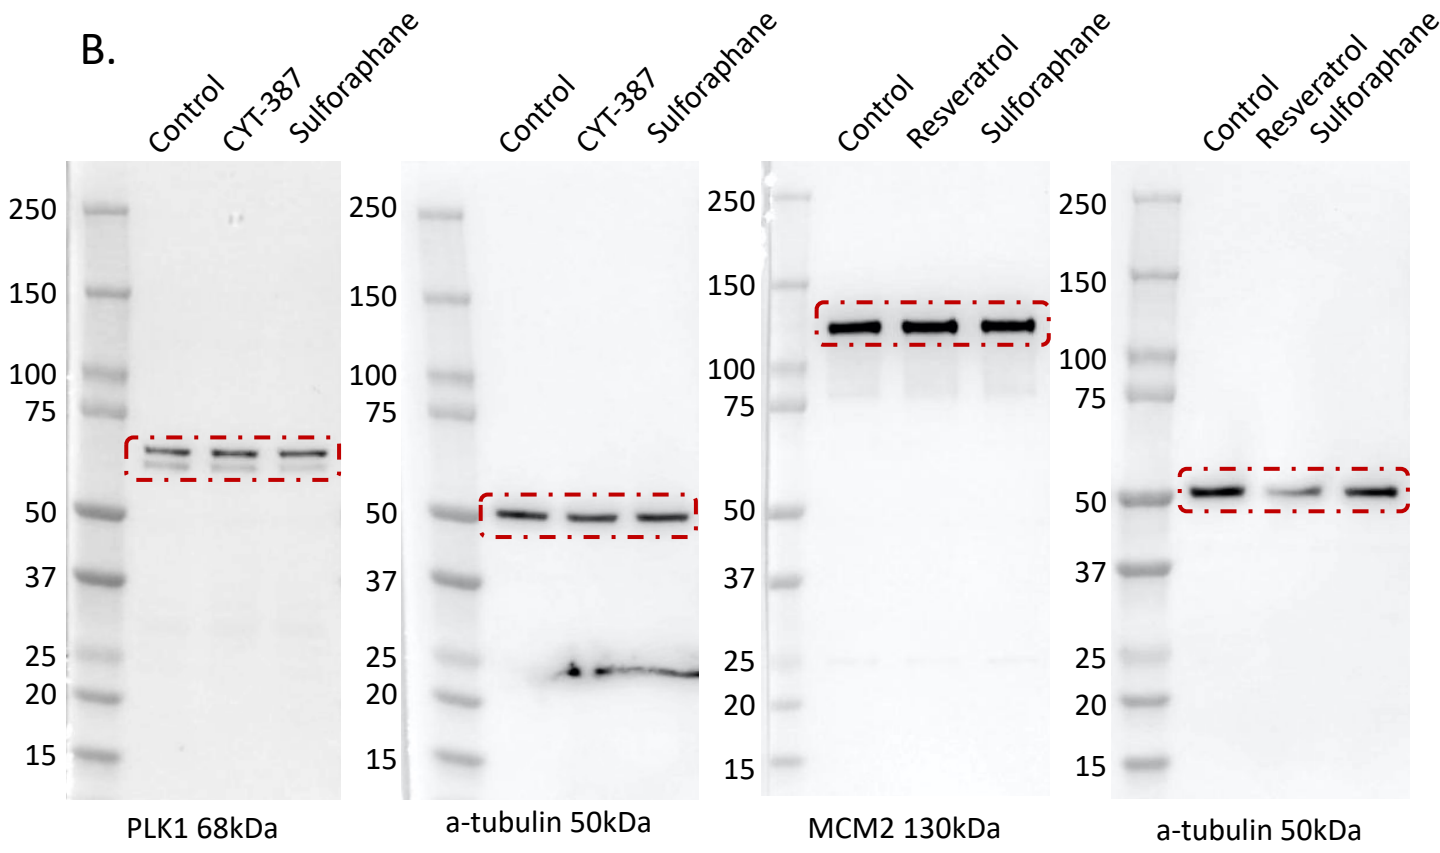

| PLK1         | Intensity ratio |
|--------------|-----------------|
| Control      | 1               |
| CYT-387      | 1.21            |
| Sulforaphane | 0.98            |

| MCM2         | Intensity ratio |
|--------------|-----------------|
| Control      | 1               |
| Resveratrol  | 2.44            |
| Sulforaphane | 1.13            |
